# Supplementary material for: Establishment of an Efficient Polyethylene Glycol (PEG)-Mediated Transformation System in Pleurotus eryngii var. ferulae Using Comprehensive Optimization and Multiple Endogenous Promoters
Source: MDPI journal article supplement (doi:10.3390/jof8020186), 2022-02-14
Supplement: s1 [file s1]

**Captions for supplemental Table and figures**

**Table S1.** qPCR, genome walking, and PCR primers.

**Figure S1.** Construction of the overexpression plasmid.

**Figure S2.** The sensitivity of wild-type *P. eryngii* var. *ferulae* in CYM medium with two different antifungal compounds (a) *cbx* resistance; (b) *hygB* resistance.

**Figure S3.** Effect of different osmotic pressure stabilizers on protoplast preparation. The eyepiece and objective of the optical microscope (starMICRO, WuXi, China) were magnified at 10x and 40x, respectively (a) mannitol; (b) sorbitol; (c) MgSO<sub>4</sub>; (d) Sucrose; (e) KCl.

**Figure S4.** Verification of the insertion of exogenous plasmids into the four transformant genomes (*P. eryngii* var. *ferulae*::*pfgpd1-egfp*, *P. eryngii* var. *ferulae*::*pfgpd1-egfp*, *P. eryngii* var. *ferulae*::*pfgpd1-egfp*, and *P. eryngii* var. *ferulae*::*pfsar1-egfp*) (a) Amplify Fragment1 (*egfp*, 717 bp) in transformants; (b) Amplify Fragment2 (promoter + *egfp*) in transformants, which are 1821, 1527, 1324, and 923 bp, respectively. M: marker. NC: negative control.

## Supplemental Table

Table S1 qPCR, genome walking, and PCR primers

| qPCR primes               |            |            |                                                         |                      |
|---------------------------|------------|------------|---------------------------------------------------------|----------------------|
| Gene                      | ID         | Prime name | Primer sequence (5′—3′)                                 | Amplicon length (bp) |
| <i>egfp</i>               |            | Fw         | TACGTGCAGGAGAGGACCAT                                    | 148                  |
|                           |            | Rv         | ACTTGTGGCCGAGGATGTTT                                    |                      |
| <i>sar1</i> <sup>a</sup>  | 1052294    | Fw         | GGATAGTCTTCCTCGTCGATAG                                  | 133                  |
|                           |            | Rv         | GGGTGCGTCAATCTTGTTAC                                    |                      |
| Genome walking primes     |            |            |                                                         |                      |
| Gene                      | ID         | Prime name | Primer sequence (5′—3′)                                 |                      |
| <i>pfsdlhb</i>            | KDQ23485.1 | S-SP1      | TCCAGAAAGAATTCAAGATCTACCG                               |                      |
|                           |            | S-SP2      | CTCGATCCGCGCTTTCTCCACCTCG                               |                      |
|                           |            | S-SP3      | AACGTCTGCGCCCGACAGAACTATC                               |                      |
| <i>pfgpd1</i>             | KDQ24107.1 | G1-SP1     | TGGGCCTTGGAATAAACAA                                     |                      |
|                           |            | G1-SP2     | GACTTCGAGCGCGTTACGGA                                    |                      |
|                           |            | G1-SP3     | CCAGATGTATTTCGAGTTAG                                    |                      |
| <i>pfgpd2</i>             | KDQ24081.1 | G2-SP1     | CACCATATAATCGAGATCAA                                    |                      |
|                           |            | G2-SP2     | AGGGCGTTACGAAAGACGAT                                    |                      |
|                           |            | G2-SP3     | TCCCACTTCCTGATGGACGC                                    |                      |
| <i>pfsar1</i>             | KDQ33428.1 | SA-SP1     | ACTTGACGTTTCCGATGGCA                                    |                      |
|                           |            | SA-SP2     | ATCATTTTTCAACATATGAA                                    |                      |
|                           |            | SA-SP3     | TGGCGTTCTTGTGGAGCAGG                                    |                      |
| <i>pfras</i>              | KDQ24534.1 | R-SP1      | TGATGATAGATGGTCGTATG                                    |                      |
|                           |            | R-SP2      | CACCCATGGTGAAAATAGAG                                    |                      |
|                           |            | R-SP3      | GGTCAAGGCTGATTTTCCGA                                    |                      |
| PCR primes                |            |            |                                                         |                      |
| Gene                      | ID         | Prime name | Primer sequence (5′—3′)                                 |                      |
| Mutant-<br><i>pfsdlhb</i> | KDQ23485.1 | MS1-Fw     | CTAGCTAGCTAGATCGAAGTTATTAGGATCCAGCATAT<br>GTTTTGGGCTGGA |                      |
|                           |            | MS1-Rv     | GACGTACAATTGAAGATGGTGAGGCAACGGAACAGA<br>CTCA            |                      |
|                           |            | MS2-Fw     | TGAGTCTGTTCCGTTGCCTCACCATCTTCAATTGTACGT<br>C            |                      |
|                           |            | MS3-Rv     | ATTGCCCCGAGCCGTTAGATGTCTCA                              |                      |
| <i>P<sub>pfgpd1</sub></i> |            | Fw         | GCCCCAAAACATATGCTGGATCCAGCTTTCTCGCTTCGT<br>CAGAGG       |                      |
|                           |            | Rv         | GTCGACTAATTTGAGCTCGATTCTAGAGACGTTGACCT<br>ATAACAAG      |                      |
| <i>P<sub>pfgpd2</sub></i> |            | Fw         | GCCCCAAAACATATGCTGGATCCCGGCTGTATGGCTTG<br>AGGC          |                      |
|                           |            | Rv         | GTCGACTAATTTGAGCTCGATTCTAGAGACGTTGACCT                  |                      |

---

|                           |    |                                        |
|---------------------------|----|----------------------------------------|
|                           |    | CCGTACGGGT                             |
| <i>P<sub>pfsar1</sub></i> | Fw | GCCCCAAAACATATGCTGGATCCCGCGAGTGGATCTGT |
|                           |    | AAGGT                                  |
|                           | Rv | GTCGACTAATTTGAGCTCGATTCTAGAGCAGGCCTGC  |
|                           |    | AGACCGAATA                             |
| <i>P<sub>pfras</sub></i>  | Fw | GCCCCAAAACATATGCTGGATCCTGCAATCAACGAGCA |
|                           |    | ACAGC                                  |
|                           | Rv | GTCGACTAATTTGAGCTCGATTCTAGAGGTGGCCTATA |
|                           |    | TGGCCATCT                              |
| <i>T<sub>pfsdhh</sub></i> | Fw | TCGAGCTCAAATTAGTCGACACCCTAGTCAACAGCCA  |
|                           |    | CGG                                    |
|                           | Rv | CGTTCGACGATCTAGCTAGCATTGCCCCGAGCCGTTAG |
|                           |    | ATG                                    |
| <i>egfp</i>               | Fw | CGTCTCTAGAATGGGTAAGGGAGAAGAAGT         |
|                           | Rv | GGTGTGCGACTTATTTGTATAGTTCATCCA         |

---

## Supplemental figures

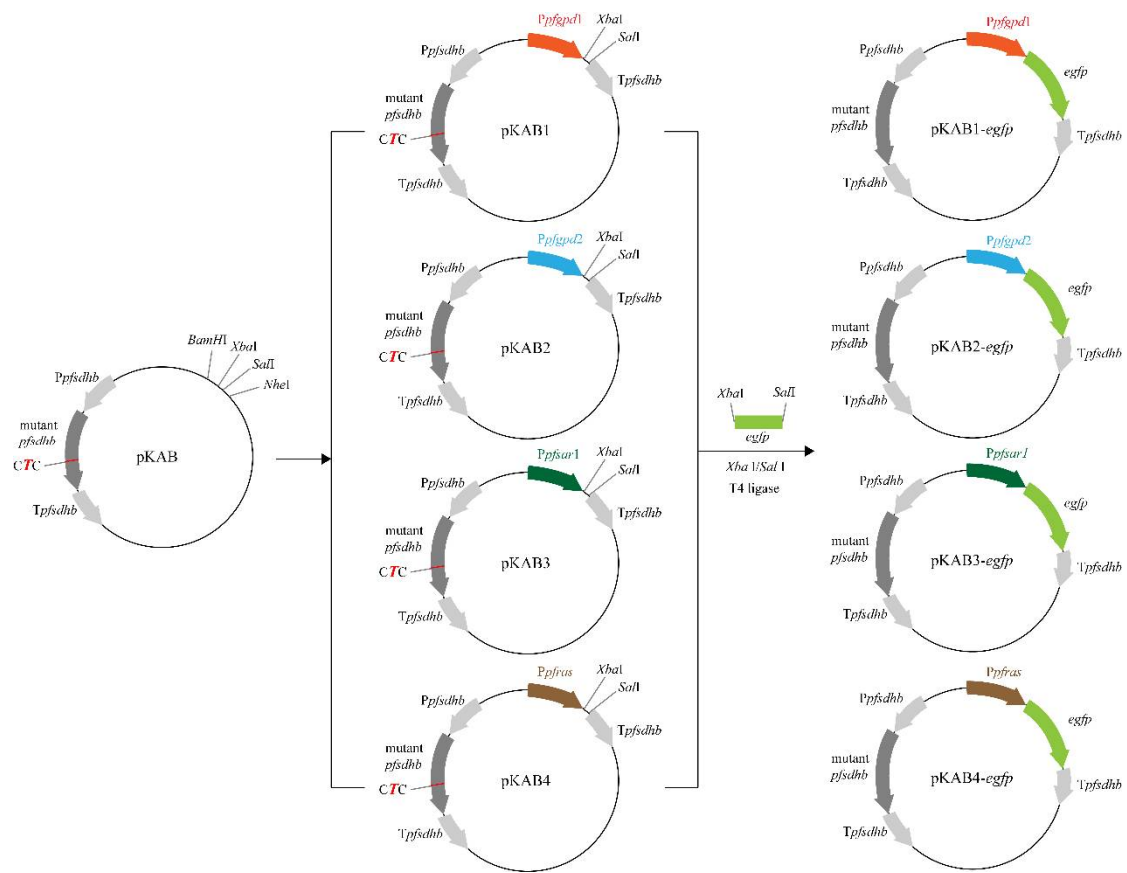

**Figure S1.** Construction of the overexpression plasmid.

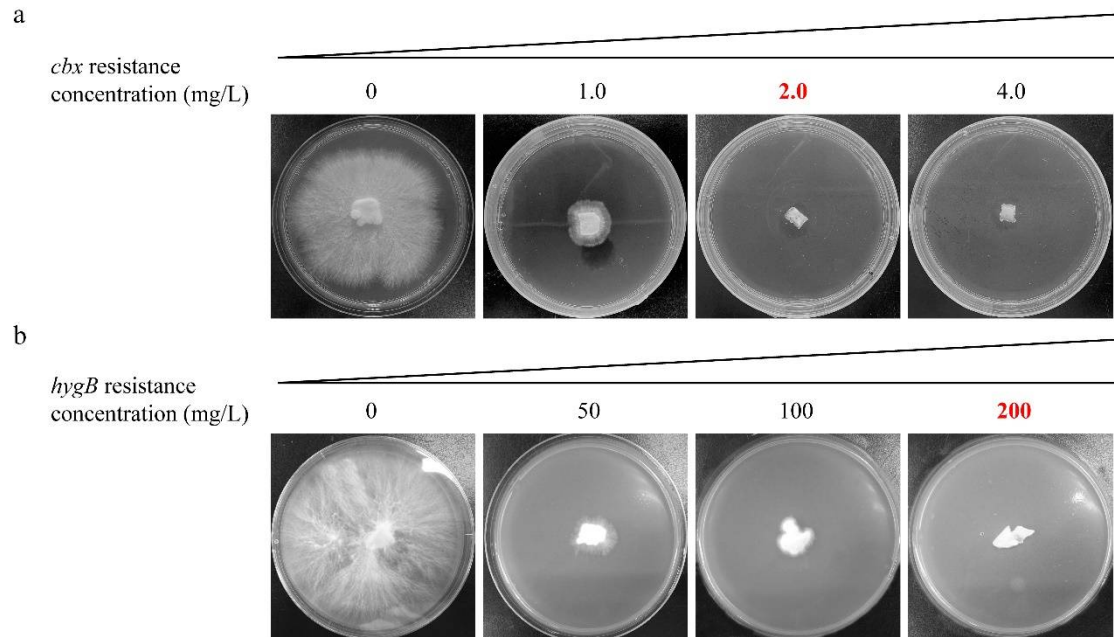

**Figure S2.** The sensitivity of wild-type *P. eryngii var. ferulae* in CYM medium with two different antifungal compounds (**a**) *cbx* resistance; (**b**) *hygB* resistance.

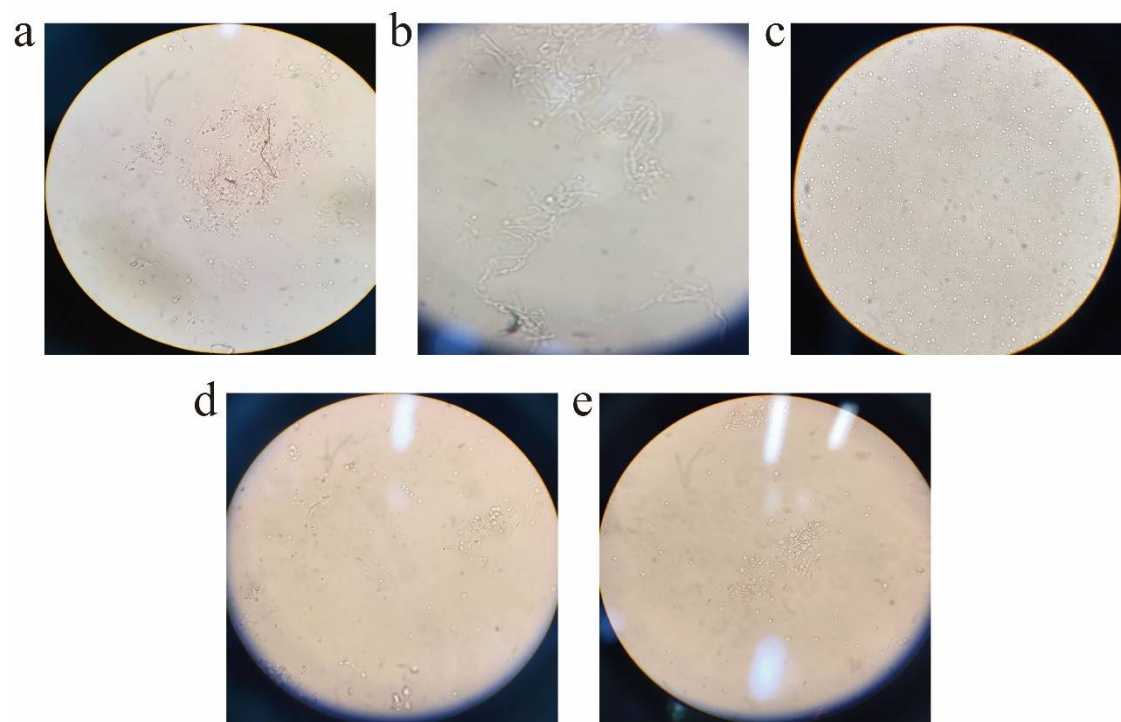

**Figure S3.** Effect of different osmotic pressure stabilizers on protoplast preparation. The eyepiece and objective of the optical microscope (starMICRO, WuXi, China) were magnified at 10x and 40x, respectively (a) mannitol; (b) sorbitol; (c)  $\text{MgSO}_4$ ; (d) Sucrose; (e) KCl.

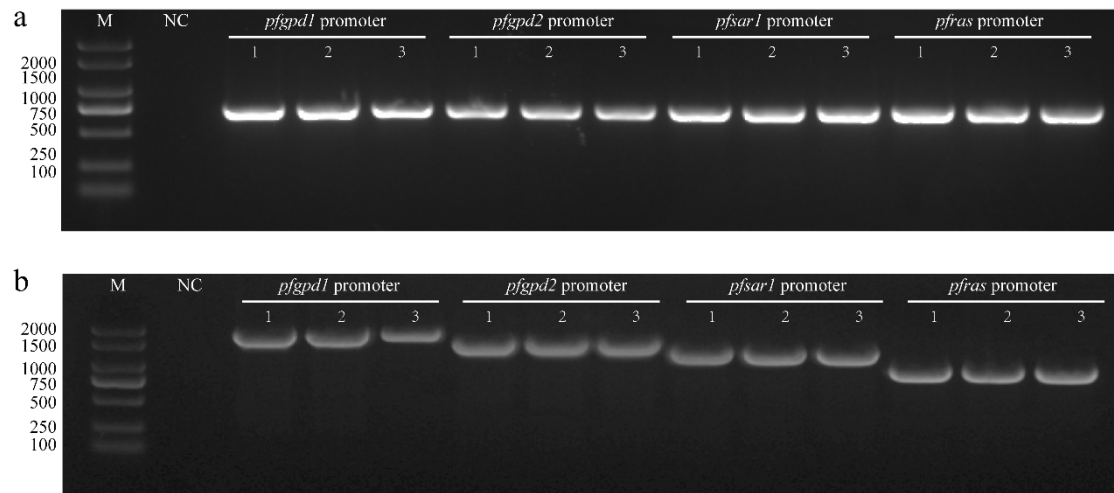

**Figure S4.** Verification of the insertion of exogenous plasmids into the four transformant genomes (*P. eryngii* var. *ferulae*::*pfgpd1-egfp*, *P. eryngii* var. *ferulae*::*pfgpd2-egfp*, *P. eryngii* var. *ferulae*::*pfgpd1-egfp*, and *P. eryngii* var. *ferulae*::*pfsar1-egfp*) (a) Amplify Fragment1 (*egfp*, 717 bp) in transformants; (b) Amplify Fragment2 (promoter + *egfp*) in transformants, which are 1821, 1527, 1324, and 923 bp, respectively. M: marker. NC: negative control.
